# Supplementary material for: Tunable photo/thermochromic properties of Cd(ii)-viologen coordination polymers modulated by coordination modes for flexible imaging films and anti-counterfeiting
Source: Royal Society of Chemistry journal article supplement (doi:10.1039/d4dt00764f), 2024-01-01
Supplement: d4dt00764f1.pdf [file d4dt00764f1.pdf]

## Supporting Information

### **Tunable Photo/Thermochromic Properties of Cd(II)-Viologen Coordination Polymers Modulated by Coordination Modes for Flexible Imager Film and Anti-counterfeiting**

Li Huang, Xiao-Nan Li, Yuan Shen, Yang Hua, Run-Hong Song, Wen-Bo Cui, Zi-Yi Li, and Hong Zhang \*

Key Laboratory of Polyoxometalate Science of Ministry of Education, Department of Chemistry, Northeast Normal University, Changchun, Jilin 130024, P.R. China.

Corresponding Author

\*E-mail: hope20130122@163.com, zhangh@nenu.edu.cn (H. Zhang).

#### **Synthesis of 1-(4-Carboxyphenyl)-4,4'-bipyridinium·Cl (HCPB·Cl)**

4,4'-Bipyridine (3.5 g, 22.5 mmol) and 2,4-dinitrochlorobenzene (3.0 g, 15 mmol) were dissolved in 25 ml of acetone and refluxed for 13 h at 56 °C. The mixture was cooled to room temperature, and the precipitate was filtered and washed several times with methylene chloride and dried under vacuum to give 1-(2,4-dinitrophenyl)-4,4'-bipyridinium·Cl as a grey powder.

1-(2,4-Dinitrophenyl)-4,4'-bipyridinium·Cl (0.65 g, 2.0 mmol) and 4-aminobenzoic acid (0.41 g, 3.0 mmol) were dissolved in 80% ethanol (50 mL), then 2.5 mmol of triethylamine was added. The reaction mixture was stirred at 90 °C for 24 hours. The precipitate was filtered, recrystallized from ethanol, and dried under vacuum to give HCPB·Cl as a reddish-brown powder.

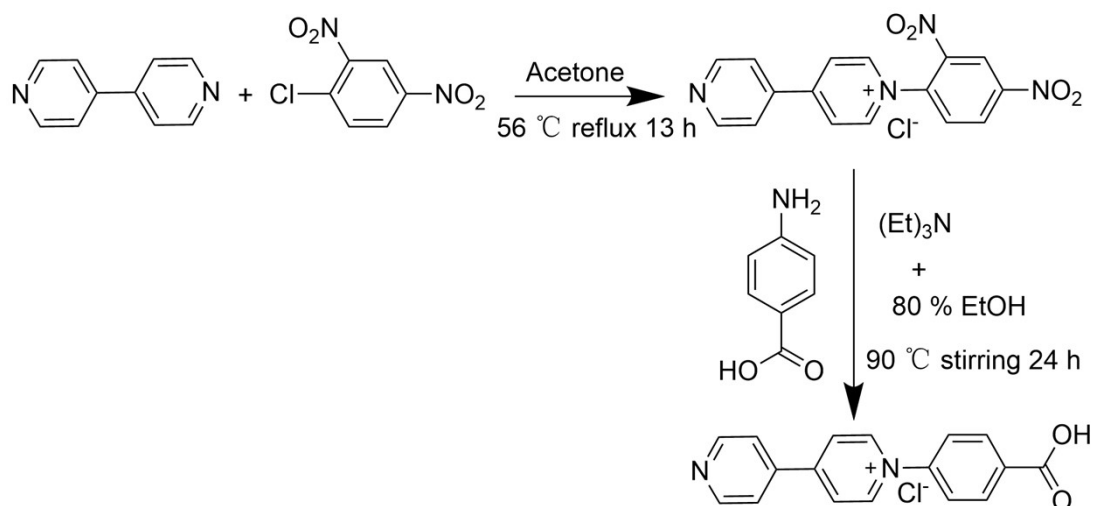

**Scheme S1.** The synthesis process of HCPB·Cl.

**Table S1.** Crystallographic data for **1** and **2**.

| Compound                                  | 1                                                                              | 2                                                                  |
|-------------------------------------------|--------------------------------------------------------------------------------|--------------------------------------------------------------------|
| Formula                                   | C <sub>68</sub> H <sub>54</sub> Cd <sub>4</sub> N <sub>4</sub> O <sub>25</sub> | C <sub>34</sub> H <sub>30</sub> CdClN <sub>5</sub> O <sub>12</sub> |
| Fw                                        | 1776.79                                                                        | 848.48                                                             |
| Crystal system                            | monoclinic                                                                     | monoclinic                                                         |
| Space group                               | <i>P2<sub>1</sub>/c</i>                                                        | <i>P2<sub>1</sub>/n</i>                                            |
| <i>a</i> /(Å)                             | 9.4800(13)                                                                     | 13.6920(4)                                                         |
| <i>b</i> /(Å)                             | 21.078(3)                                                                      | 18.1108(5)                                                         |
| <i>c</i> /(Å)                             | 17.495(3)                                                                      | 18.0526(7)                                                         |
| <i>α</i> (°)                              | 90                                                                             | 90                                                                 |
| <i>β</i> (°)                              | 104.272(9)                                                                     | 131.224(2)                                                         |
| <i>γ</i> (°)                              | 90                                                                             | 90                                                                 |
| <i>V</i> /(Å <sup>3</sup> )               | 3388.0(9)                                                                      | 3367.0(2)                                                          |
| <i>Z</i>                                  | 4                                                                              | 4                                                                  |
| Temperature/(K)                           | 293.17                                                                         | 100.7                                                              |
| $\rho_{\text{calc}}$ (g/cm <sup>3</sup> ) | 1.742                                                                          | 1.630                                                              |
| <i>F</i> (000)                            | 1776.0                                                                         | 1144.0                                                             |
| $\mu$ /(mm <sup>-1</sup> )                | 10.652                                                                         | 0.724                                                              |
| Reflections collected                     | 18963                                                                          | 20759                                                              |
| Independent reflections                   | 5926                                                                           | 7854                                                               |
| R1 [ <i>I</i> ≥ 2σ( <i>I</i> )]           | 0.0463                                                                         | 0.0408                                                             |
| wR <sub>2</sub> [all data]                | 0.1237                                                                         | 0.1032                                                             |
| GOF on <i>F</i> <sup>2</sup>              | 1.037                                                                          | 1.053                                                              |

**Table S2.** Hydrogen bond distances (Å) of compounds **1**.

| <i>Hydrogen Bond</i> | <i>Distance</i> |
|----------------------|-----------------|
| C1-H1...O5           | 2.590(6)        |
| C5-H5...O2           | 2.770(5)        |
| C5-H5...O4           | 3.282(4)        |
| C5-H5...O7           | 3.102(7)        |
| C7-H7...O1           | 2.977(2)        |
| C7-H7...O8           | 2.280(0)        |
| C7-H7...O9           | 3.134(1)        |
| C8-H8...O4           | 2.252(4)        |
| C8-H8...O5           | 2.985(6)        |

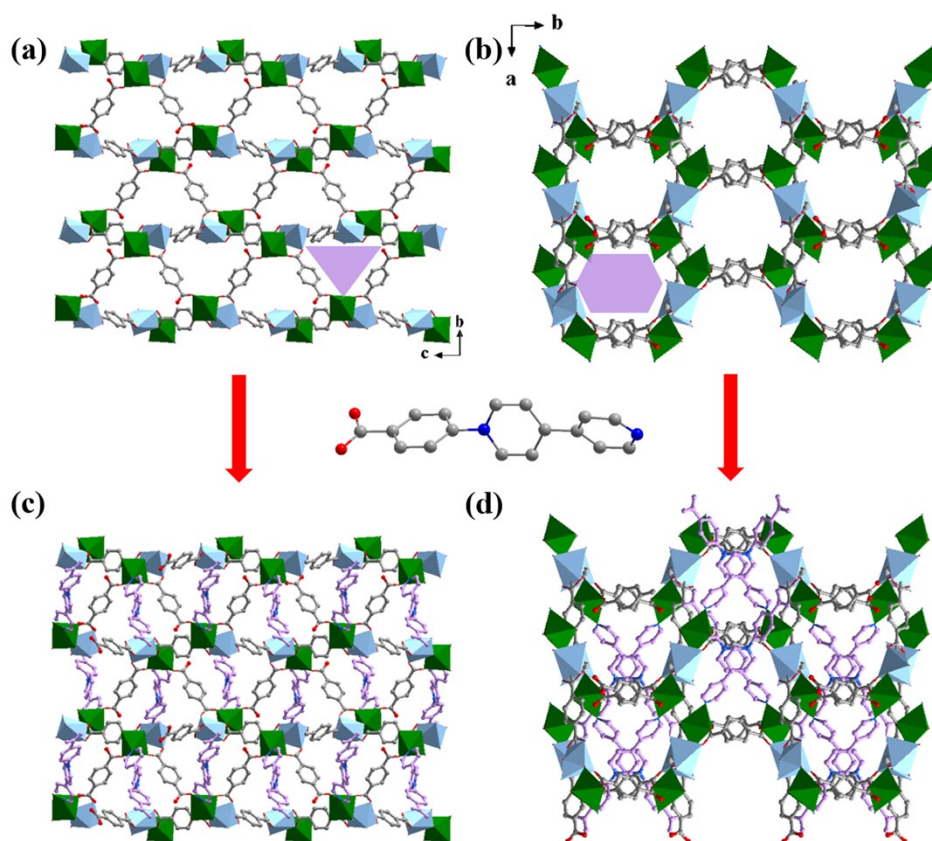

**Fig. S1** View of the  $[\text{Cd}_4(\text{BDC})_4(\text{H}_2\text{O})_2]_n$  3D architecture constructed: the triangular channel along the *a*-axis (a) and the hexagonal channel along the *c*-axis (b). The 3D structure of **1** along the *a*-axis (c) and *c*-axis (d).

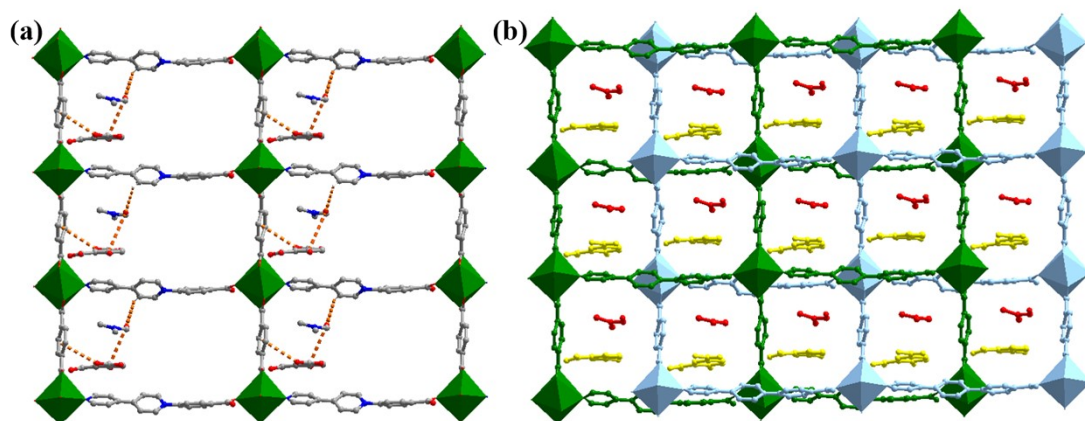

**Fig. S2** (a) The interactions between free molecules and the 2D layer in **2**. (b) 2-fold interpenetrated of 2D layer accompanied by free molecules.

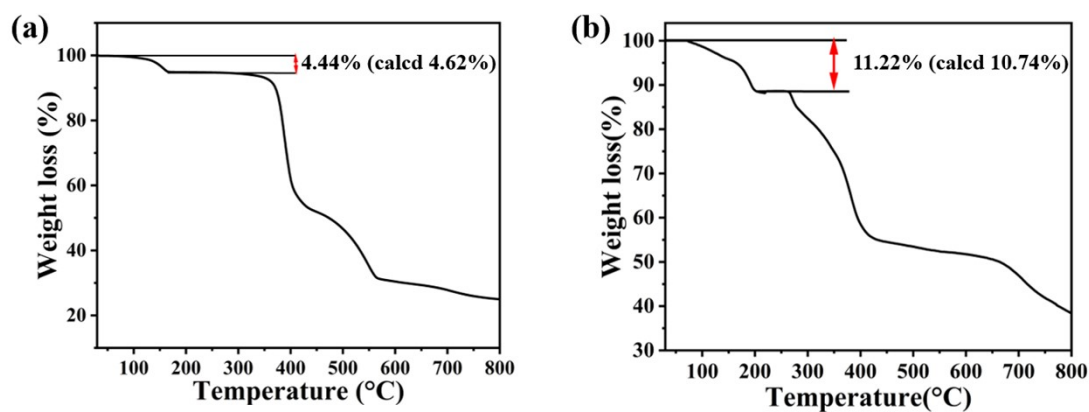

**Fig. S3** The TG plots for **1** (a) and **2** (b).

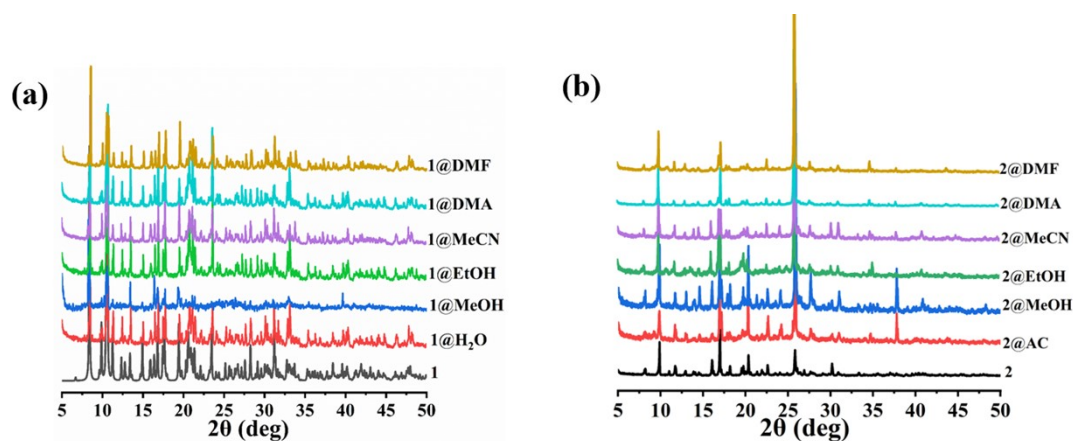

**Fig. S4** PXRD patterns of **1** (a) and **2** (b) immersed in different solutions.

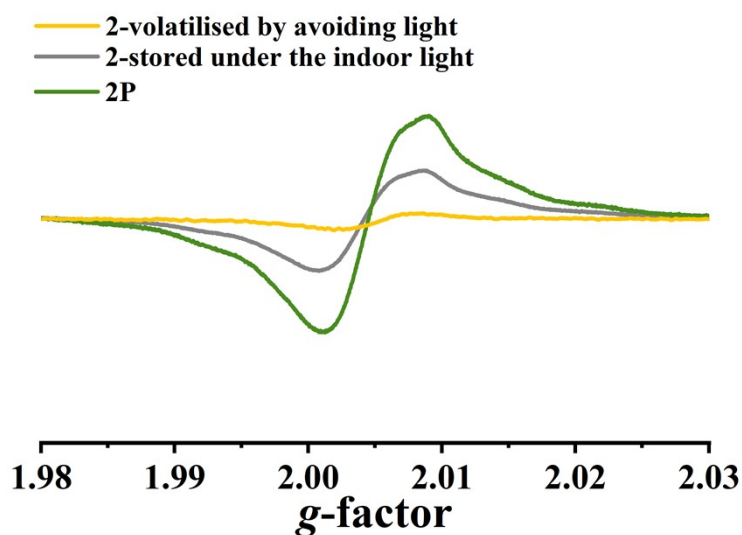

**Fig. S5** The EPR spectra of **2** volatilized by avoiding light, stored under the indoor light for several months, and irradiated by UV light.

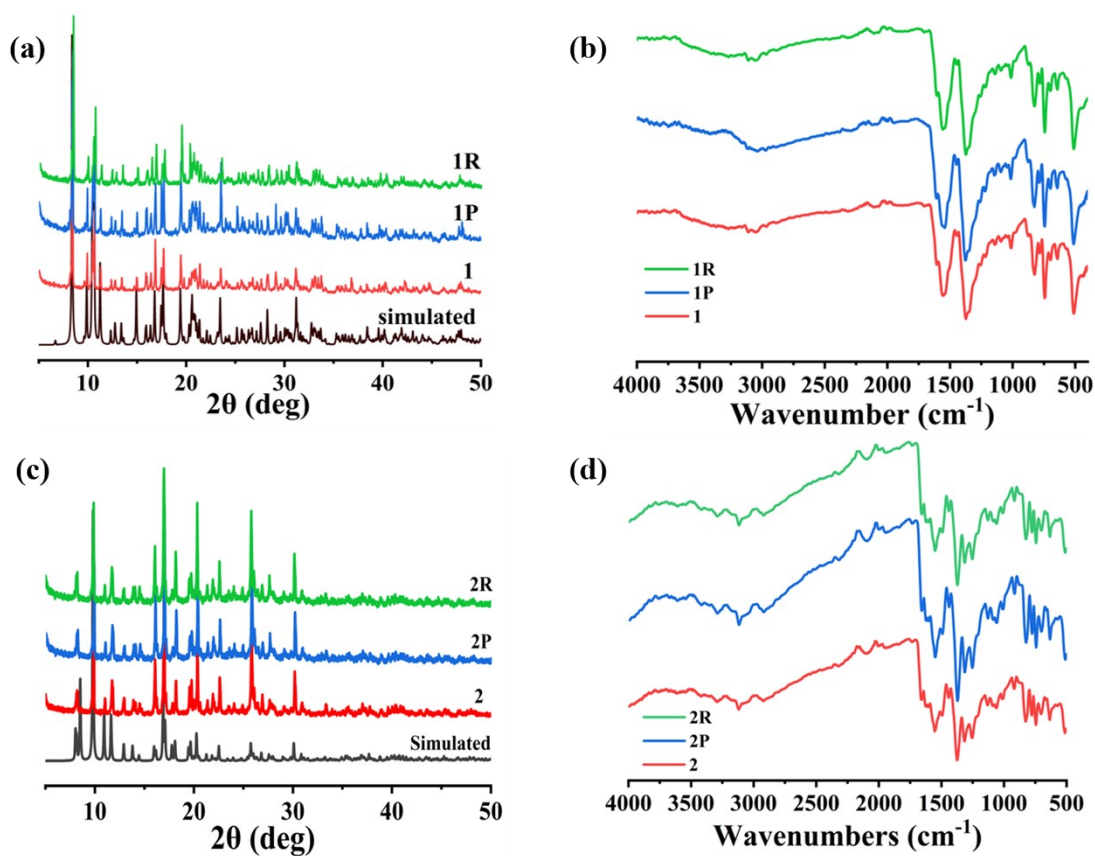

**Fig. S6** Simulated, experimental, photochromic, and decolored PXRD patterns of **1** (a) and **2** (c). IR spectra of **1** (b) and **2** (d) before and after coloration.

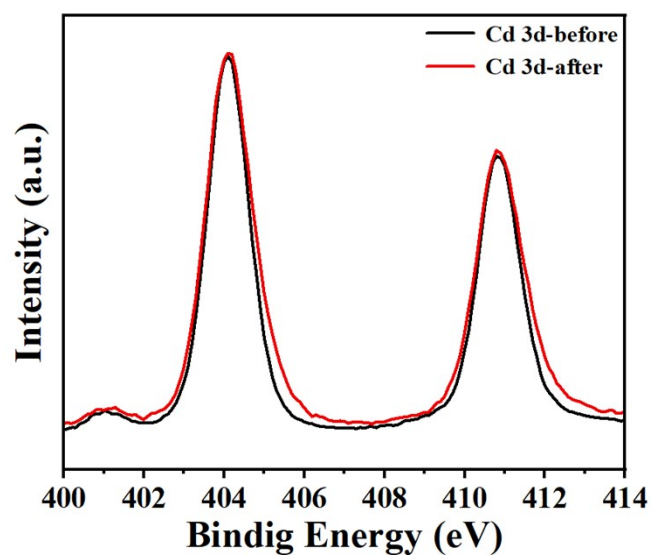

**Fig. S7** Cd 3d XPS core-level spectra of **1** before and after irradiation by UV light.

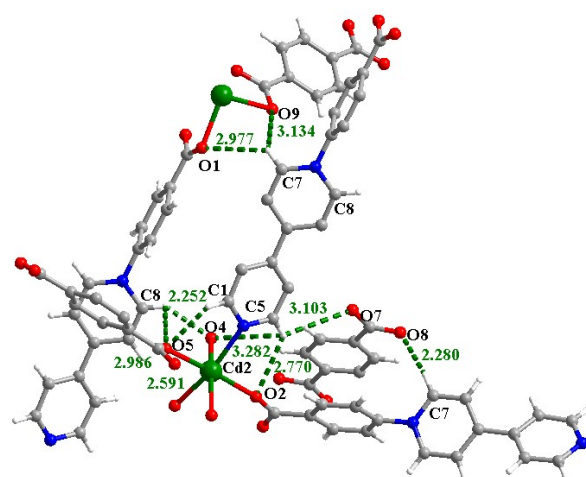

**Fig. S8** The distances between the hydrogen atom at the  $\alpha$ -carbon atom of the pyridinium group and the carboxylate O atom in **1**.

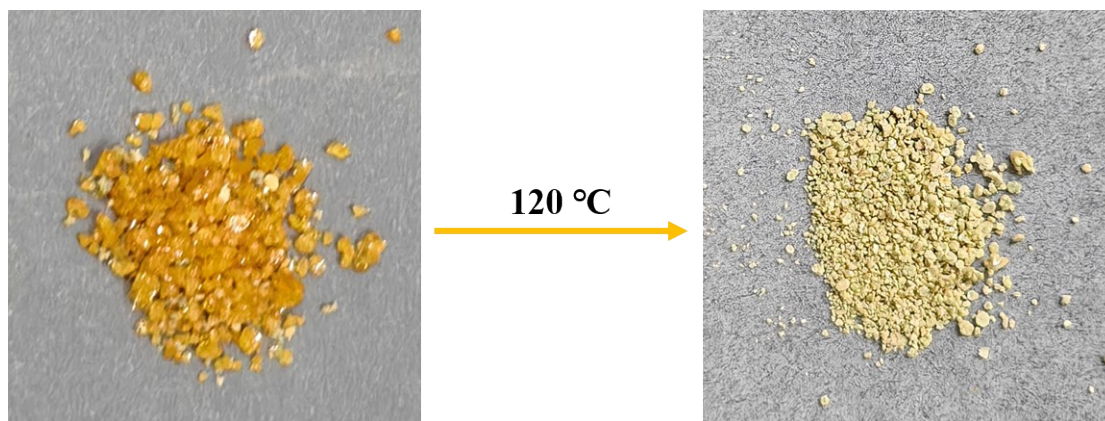

**Fig. S9** Photographs of crystal sample **1** heated at 120 °C for 30 minutes.

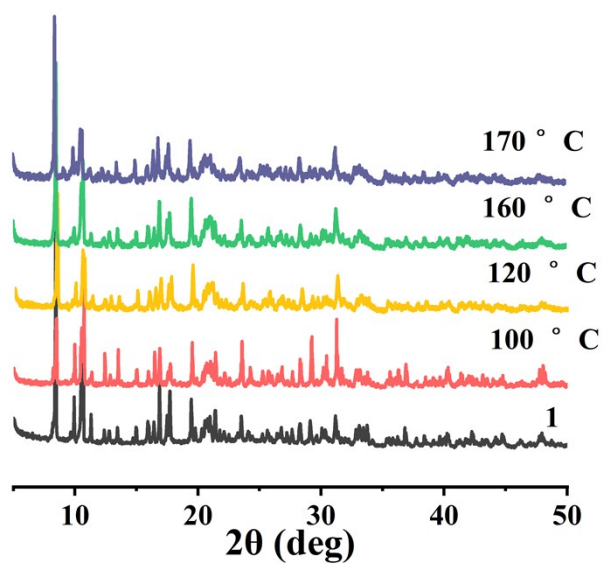

**Fig. S10** PXRD patterns of **1** heated at 100 °C, 120 °C, 160 °C, and 170 °C.

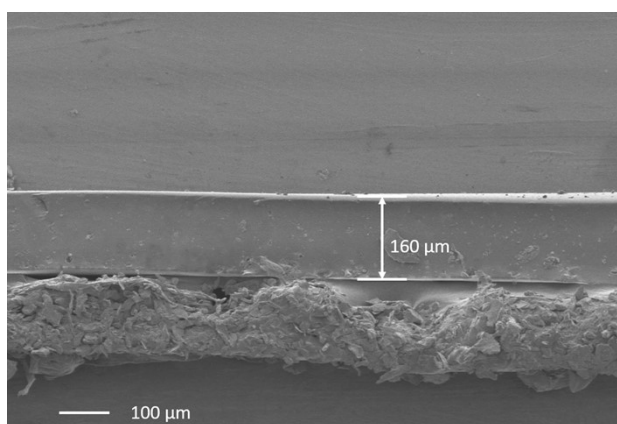

**Fig. S11** The SEM photos of the profile for **1@PDMS** film.

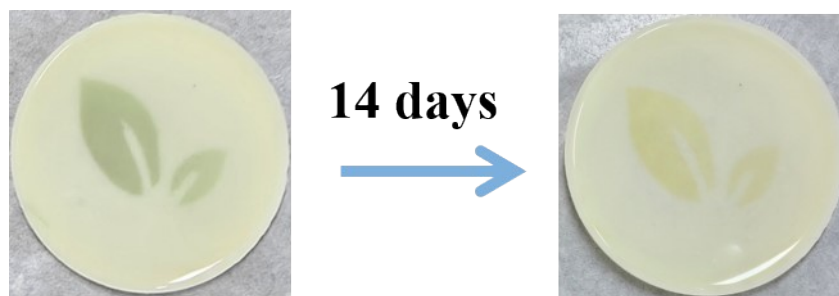

**Fig. S12** The photochromism imaging for the flexible film after 4 min UV illuminated and placed in the dark for 14 days.
